# Supplementary material
Source: PubMed Central journal article supplement (PMC8721780)
Supplement: sj-pdf-2-jcb-10.1177_0271678X211039592.pdf [file sj-pdf-2-jcb-10.1177_0271678X211039592.pdf]

**Supplemental Table 1.** Properties of *NMDAR sparklets*.

|                                                                 | <b><i>Mode</i></b> | <b><i>Mean ± SD</i></b> |
|-----------------------------------------------------------------|--------------------|-------------------------|
| <i>Amplitude (<math>\Delta F/F_0</math>)</i> <sup>1</sup>       | 1.08               | 1.15 ± 0.13             |
| <i>Attack time (ms)</i> <sup>2</sup>                            | 75                 | 105 ± 67                |
| <i>Decay time (ms)</i> <sup>2</sup>                             | 75                 | 150 ± 89                |
| <i>Duration (ms)</i> <sup>2</sup>                               | 300 and 500        | 509 ± 268               |
| <i>Spatial Spread (<math>\mu\text{m}^2</math>)</i> <sup>1</sup> | 8                  | 16.85 ± 12.15           |

<sup>1</sup>Total of 1783 events analyzed; <sup>2</sup>Total of 509 events analyzed
